# Supplementary material for: Highly flexible, erosion resistant and nitrogen doped hollow SiC fibrous mats for high temperature thermal insulators
Source: Royal Society of Chemistry journal article supplement (doi:10.1039/c6ta09475a), 2017-01-01
Supplement: c6ta09475a1.pdf [file c6ta09475a1.pdf]

## Supplemental Information

### Highly flexible, erosion resistant and nitrogen doped hollow SiC fibrous mats for high temperature thermal insulators

Yanan Liu<sup>‡a</sup>, Yang Liu<sup>‡a</sup>, Woo Cheal Choi<sup>b</sup>, Suhyeong Chae<sup>a</sup>, Jinpyo Lee<sup>a</sup>, Byoung-Suhk Kim<sup>a</sup>, Mira Park<sup>c\*</sup>, Hak Yong Kim<sup>a\*\*</sup>

<sup>a</sup>Department of BIN Convergence Technology, Chonbuk National University, Jeonju, 561-756, South Korea

<sup>b</sup>Department of Source Material Technology, DACC Carbon Co., Ltd., 30, Unam-ro, Deokjin-gu, Jeonju, 561-202, South Korea

<sup>c</sup>Department of Organic Materials and Fiber Engineering, Chonbuk National University, Jeonju 561-756, South Korea

---

\* Corresponding author: Tel: +82-63-270-2351, Fax: +82-63-270-4249.

E-mail address: wonderfulmira@jbnu.ac.kr (M. Park)

\*\* Corresponding author: Tel: +82-63-270-2351, Fax: +82-63-270-4249.

E-mail address: khy@jbnu.ac.kr (H. Y. Kim)

‡ These authors contributed equally to this work.

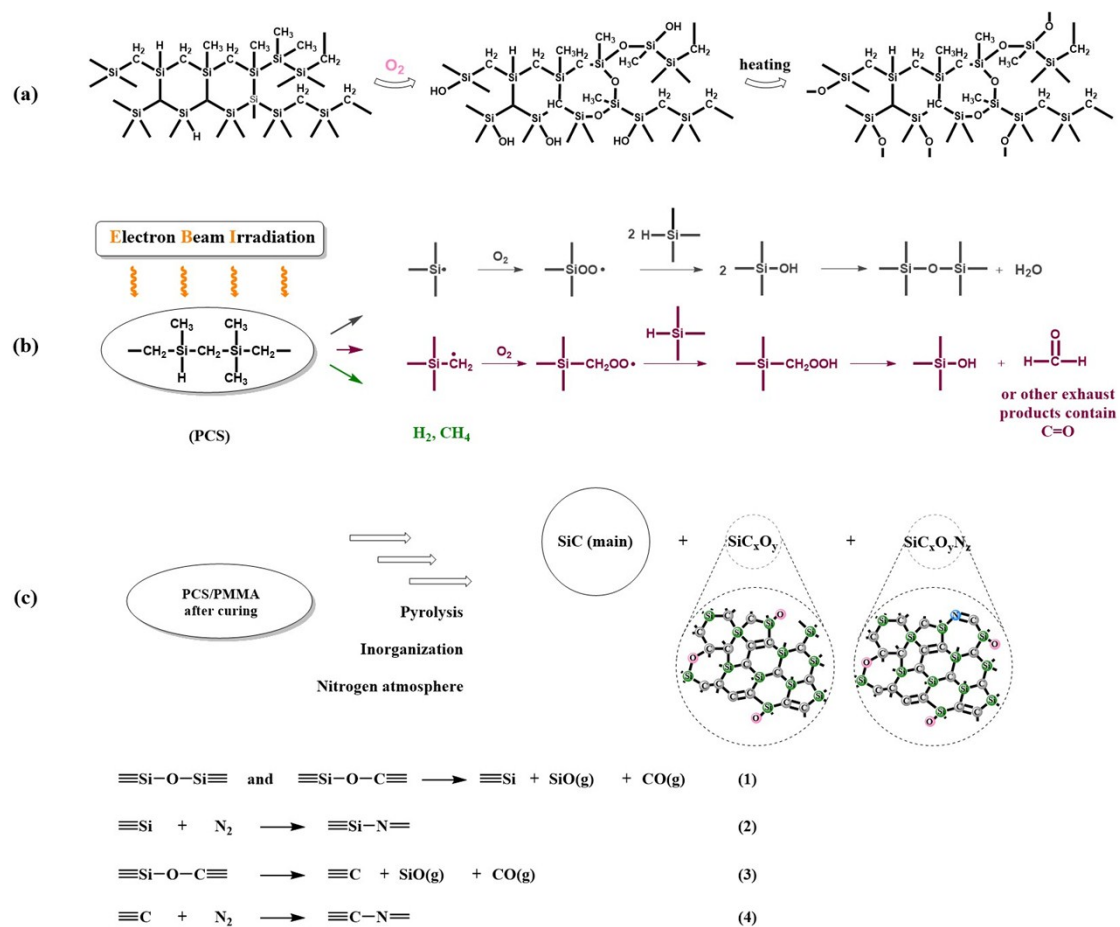

Fig. S1 The main reaction mechanisms during the (1) thermal curing process, (2) EBI curing process and (3) pyrolysis process of PCS.

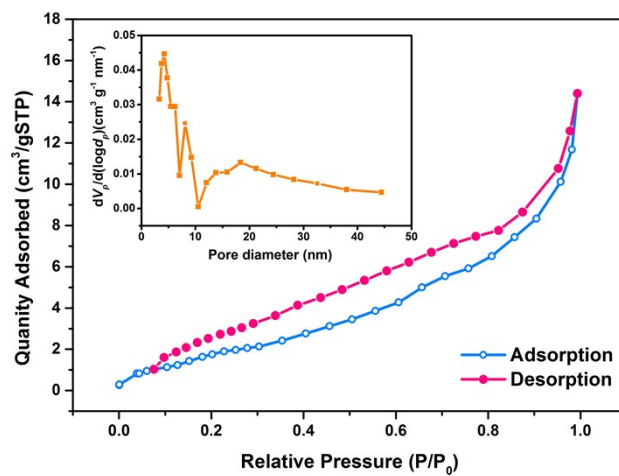

Fig. S2 Nitrogen adsorption–desorption isotherms and the corresponding pore size distribution calculated using adsorption branch of the BJH algorithm for NHSiC-1500 fibrous mats.

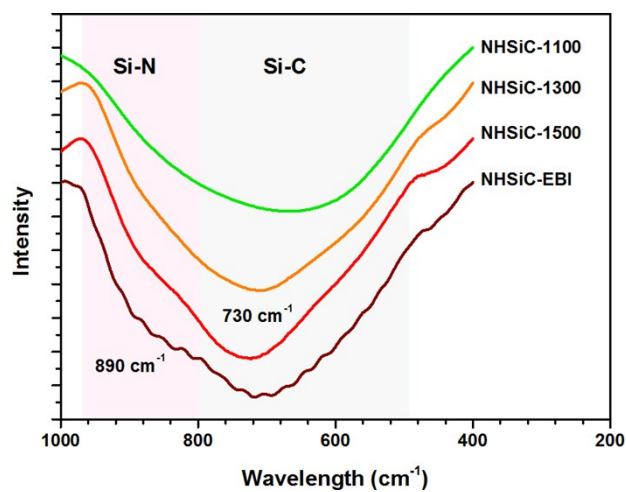

Fig. S3 The magnification of the FTIR spectra between 1000  $\text{cm}^{-1}$  and 400  $\text{cm}^{-1}$ .

Table S1. The atomic analysis of NHSiC-1100, 1300, and 1500 fibers from XPS spectra.

| Samples    | Atomic % |      |       |       |
|------------|----------|------|-------|-------|
|            | C1s      | N1s  | O1s   | Si2p  |
| NHSiC-1100 | 54.20    | 1.33 | 12.90 | 31.57 |
| NHSiC-1300 | 53.54    | 3.21 | 12.07 | 31.18 |
| NHSiC-1500 | 49.05    | 8.55 | 11.48 | 30.92 |
| NHSiC-EBI  | 52.05    | 9.48 | 7.34  | 31.14 |

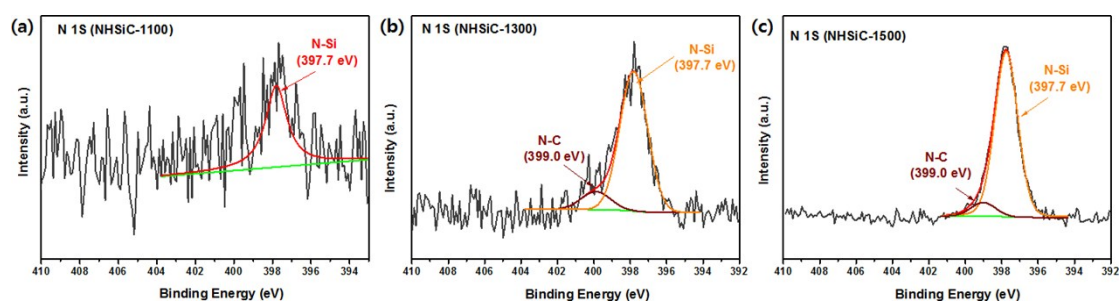

Fig. S4 XPS spectra of N 1s analysis of NHSiC-1100, 1300, and 1500 fibers.

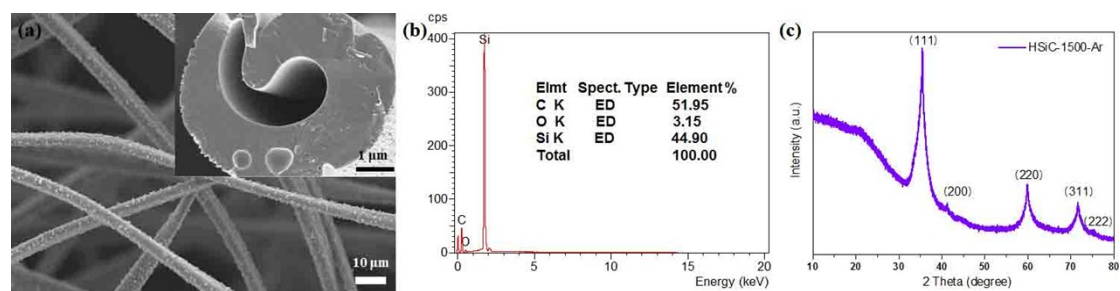

Fig. S5 SEM images, EDX, and XRD patterns of HSiC-Ar fibers

Table S2. Thickness, bulk density, thermal conductivities, thermal diffusivities and specific heats of NHSiC-1500, NHSiC-EBI and HSiC-Ar fibers

| Samples    | Thickness (mm) | Bulk density (g/cm <sup>3</sup> ) | Skeletal density (g/cm <sup>3</sup> ) | Temp (°C) | Specific heat (J/g/K) | Thermal diffusivity (mm <sup>2</sup> /s) | Thermal conductivity (W/mK) |
|------------|----------------|-----------------------------------|---------------------------------------|-----------|-----------------------|------------------------------------------|-----------------------------|
| NHSiC-1500 | 0.572          | 0.218                             | 2.487                                 | 25        | 0.548                 | 0.121                                    | 0.014                       |
|            |                |                                   |                                       | 150       | 0.641                 | 0.137                                    | 0.019                       |
|            |                |                                   |                                       | 300       | 0.682                 | 0.161                                    | 0.024                       |
|            |                |                                   |                                       | 450       | 0.689                 | 0.199                                    | 0.030                       |
|            |                |                                   |                                       | 600       | 0.704                 | 0.252                                    | 0.039                       |
| NHSiC-EBI  | 0.621          | 0.216                             | 2.456                                 | 25        | 0.563                 | 0.130                                    | 0.016                       |
|            |                |                                   |                                       | 150       | 0.663                 | 0.142                                    | 0.020                       |
|            |                |                                   |                                       | 300       | 0.692                 | 0.173                                    | 0.026                       |
|            |                |                                   |                                       | 450       | 0.710                 | 0.228                                    | 0.035                       |
|            |                |                                   |                                       | 600       | 0.725                 | 0.266                                    | 0.042                       |
| HSiC-Ar    | 0.552          | 0.191                             | 2.251                                 | 25        | 1.772                 | 0.407                                    | 0.138                       |
|            |                |                                   |                                       | 150       | 2.101                 | 0.391                                    | 0.157                       |
|            |                |                                   |                                       | 300       | 2.158                 | 0.395                                    | 0.163                       |
|            |                |                                   |                                       | 450       | 2.252                 | 0.420                                    | 0.181                       |
|            |                |                                   |                                       | 600       | 2.287                 | 0.434                                    | 0.190                       |
